# Supplementary material for: HLA specificities are associated with prognosis in IGHV-mutated CLL-like high-count monoclonal B cell lymphocytosis
Source: PLoS One. 2017 Mar 1;12(3):e0172978. doi: 10.1371/journal.pone.0172978 (PMC5332061; doi:10.1371/journal.pone.0172978)
Supplement: S2 Table — (XLSX) [file pone.0172978.s002.xlsx]

## Sheet: HLA - progressive hiMBL
Sup. Table 2	HLA allelic frequencies comparing non-pMBL, pMBL/CLL, and healthy controls. NS indicates P-value >0.1
HLA allele	Healthy Donors n=1940	non-pMBL (n=74)	P-value		Healthy Donors n=1940	pMBL/Binet A CLL (n=128)	P-value	Pc		non-pMBL (n=74)	pMBL/Binet A CLL (n=128)	P-value	Pc
A*01	0.11134	0.07812	NS		0.11134	0.06757	NS			0.07812	0.06757	NS
A*02	0.26366	0.28516	NS		0.26366	0.2973	NS			0.28516	0.2973	NS
A*03	0.09639	0.10156	NS		0.09639	0.11486	NS			0.10156	0.11486	NS
A*11	0.0732	0.09766	NS		0.0732	0.14189	0.0004	0.0076		0.09766	0.14189	NS
A*23	0.0433	0.03125	NS		0.0433	0.02027	NS			0.03125	0.02027	NS
A*24	0.09201	0.07422	NS		0.09201	0.05405	NS			0.07422	0.05405	NS
A*25	0.01907	0.00781	NS		0.01907	0.02027	NS			0.00781	0.02027	NS
A*26	0.04227	0.04297	NS		0.04227	0.00676	NS			0.04297	0.00676	NS
A*29	0.07191	0.06641	NS		0.07191	0.06081	NS			0.06641	0.06081	NS
A*30	0.05825	0.08594	NS		0.05825	0.09459	NS			0.08594	0.09459	NS
A*31	0.02191	0.00781	NS		0.02191	0.02703	NS			0.00781	0.02703	NS
A*32	0.03351	0.01562	NS		0.03351	0.03378	NS			0.01562	0.03378	NS
A*33	0.02552	0.01172	NS		0.02552	0	NS			0.01172	0	NS
A*34	0.00206	0.01172	NS		0.00206	0	NS			0.01172	0	NS
A*66	0.00644	0.01562	NS		0.00644	0	NS			0.01562	0	NS
A*68	0.03479	0.06641	NS		0.03479	0.05405	NS			0.06641	0.05405	NS
A*69	0.00284	0	NS		0.00284	0	NS			0	0	-
A*74	0.00026	0	NS		0.00026	0	NS			0	0	-
A*80	0.00129	0	NS		0.00129	0.00676	NS			0	0.00676	NS
B*07	0.08505	0.07031	NS		0.08505	0.0473	NS			0.07031	0.0473	NS
B*08	0.06186	0.05078	NS		0.06186	0.06757	NS			0.05078	0.06757	NS
B*13	0.01778	0.00781	NS		0.01778	0.00676	NS			0.00781	0.00676	NS
B*14	0.06083	0.05859	NS		0.06083	0.06081	NS			0.05859	0.06081	NS
B*15	0.04794	0.05078	NS		0.04794	0.06081	NS			0.05078	0.06081	NS
B*18	0.07835	0.12109	NS		0.07835	0.10811	NS			0.12109	0.10811	NS
B*27	0.03119	0.02344	NS		0.03119	0.02703	NS			0.02344	0.02703	NS
B*35	0.10335	0.10156	NS		0.10335	0.08784	NS			0.10156	0.08784	NS
B*37	0.00928	0.01562	NS		0.00928	0.01351	NS			0.01562	0.01351	NS
B*38	0.03273	0.03125	NS		0.03273	0.03378	NS			0.03125	0.03378	NS
B*39	0.01521	0.01172	NS		0.01521	0.0473	NS			0.01172	0.0473	NS
B*40	0.03247	0.03516	NS		0.03247	0.02027	NS			0.03516	0.02027	NS
B*41	0.01031	0.03516	NS		0.01031	0.01351	NS			0.03516	0.01351	NS
B*42	0.00026	0	NS		0.00026	0	NS			0	0	-
B*44	0.16392	0.17188	NS		0.16392	0.10135	0.008	0.232		0.17188	0.10135	0.0616	1.4784
B*45	0.01314	0.01172	NS		0.01314	0.01351	NS			0.01172	0.01351	NS
B*47	0.00258	0	NS		0.00258	0	NS			0	0	-
B*49	0.04046	0.02734	NS		0.04046	0.03378	NS			0.02734	0.03378	NS
B*50	0.02577	0.02734	NS		0.02577	0.02703	NS			0.02734	0.02703	NS
B*51	0.08428	0.07422	NS		0.08428	0.12838	NS			0.07422	0.12838	0.0992	2.3808
B*52	0.01237	0.01172	NS		0.01237	0.01351	NS			0.01172	0.01351	NS
B*53	0.01237	0.01562	NS		0.01237	0.03378	NS			0.01562	0.03378	NS
B*55	0.01108	0.01953	NS		0.01108	0	NS			0.01953	0	NS
B*56	0.00335	0	NS		0.00335	0.01351	NS			0	0.01351	NS
B*57	0.02861	0.01953	NS		0.02861	0.01351	NS			0.01953	0.01351	NS
B*58	0.0134	0.00781	NS		0.0134	0.02703	NS			0.00781	0.02703	NS
B*59	0	0	-		0	0	-			0	0	-
B*67	0.00052	0	NS		0.00052	0	NS			0	0	-
B*73	0.00077	0	NS		0.00077	0	NS			0	0	-
B*78	0.00077	0	NS		0.00077	0	NS			0	0	-
C*01	0.02744	0.01953	NS		0.02744	0.04054	NS			0.01953	0.04054	NS
C*02	0.07012	0.03906	NS		0.07012	0.0473	NS			0.03906	0.0473	NS
C*03	0.08232	0.0625	NS		0.08232	0.06757	NS			0.0625	0.06757	NS
C*04	0.13415	0.125	NS		0.13415	0.12838	NS			0.125	0.12838	NS
C*05	0.09146	0.14062	NS		0.09146	0.11486	NS			0.14062	0.11486	NS
C*06	0.07927	0.07812	NS		0.07927	0.08108	NS			0.07812	0.08108	NS
C*07	0.22561	0.22266	NS		0.22561	0.18919	NS			0.22266	0.18919	NS
C*08	0.06098	0.0625	NS		0.06098	0.07432	NS			0.0625	0.07432	NS
C*12	0.07012	0.07031	NS		0.07012	0.07432	NS			0.07031	0.07432	NS
C*14	0.02134	0.01953	NS		0.02134	0.03378	NS			0.01953	0.03378	NS
C*15	0.06707	0.03516	NS		0.06707	0.08108	NS			0.03516	0.08108	NS
C*16	0.06707	0.08984	NS		0.06707	0.05405	NS			0.08984	0.05405	NS
C*17	0.00305	0.03125	NS		0.00305	0.01351	NS			0.03125	0.01351	NS
C*18	0	0.00391	NS		0	0	-			0.00391	0	NS
DRB1*01	0.10412	0.07422	NS		0.10412	0.09459	NS			0.07422	0.09459	NS
DRB1*03	0.12217	0.17188	NS		0.12217	0.17568	0.0148	0.1924		0.17188	0.17568	NS
DRB1*04	0.13273	0.14062	NS		0.13273	0.10811	NS			0.14062	0.10811	NS
DRB1*07	0.15954	0.16016	NS		0.15954	0.17568	NS			0.16016	0.17568	NS
DRB1*08	0.02809	0.01172	NS		0.02809	0.02703	NS			0.01172	0.02703	NS
DRB1*09	0.00644	0	NS		0.00644	0.01351	NS			0	0.01351	NS
DRB1*10	0.0165	0.01953	NS		0.0165	0.01351	NS			0.01953	0.01351	NS
DRB1*11	0.12397	0.13672	NS		0.12397	0.10135	NS			0.13672	0.10135	NS
DRB1*12	0.0134	0.00781	NS		0.0134	0	NS			0.00781	0	NS
DRB1*13	0.13711	0.13281	NS		0.13711	0.17568	NS			0.13281	0.17568	NS
DRB1*14	0.0268	0.03516	NS		0.0268	0.00676	NS			0.03516	0.00676	NS
DRB1*15	0.10593	0.06641	NS		0.10593	0.06757	NS			0.06641	0.06757	NS
DRB1*16	0.0232	0.04297	NS		0.0232	0.04054	NS			0.04297	0.04054	NS
DQB1*02	0.26829	0.32422	NS		0.26829	0.33108	0.0296	0.148		0.32422	0.33108	NS
DQB1*03	0.32317	0.3125	NS		0.32317	0.27703	NS			0.3125	0.27703	NS
DQB1*04	0.02439	0.01953	NS		0.02439	0.02703	NS			0.01953	0.02703	NS
DQB1*05	0.18902	0.19141	NS		0.18902	0.18243	NS			0.19141	0.18243	NS
DQB1*06	0.19512	0.15234	NS		0.19512	0.18243	NS			0.15234	0.18243	NS
