# Supplementary material for: HLA specificities are associated with prognosis in IGHV-mutated CLL-like high-count monoclonal B cell lymphocytosis
Source: PLoS One. 2017 Mar 1;12(3):e0172978. doi: 10.1371/journal.pone.0172978 (PMC5332061; doi:10.1371/journal.pone.0172978)
Supplement: S4 Table — (XLSX) [file pone.0172978.s004.xlsx]

## Sheet: HLA - IGHV status
Sup. Table 4	HLA allelic frequencies comparing mutated vs. unmutated hiMBL and Binet A CLL patients. NS indicates P-value >0.1
HLA allele	Mutated (n=157)	Unmutated (n=64)	P-value	Pc
A*01	0.07962	0.10156	NS
A*02	0.30573	0.26562	NS
A*03	0.09236	0.11719	NS
A*11	0.11465	0.10156	NS
A*23	0.03503	0.01562	NS
A*24	0.04459	0.10938	0.0167	0.2839
A*25	0.01274	0.00781	NS
A*26	0.03503	0.03125	NS
A*29	0.05096	0.07812	NS
A*30	0.0828	0.08594	NS
A*31	0.01592	0.01562	NS
A*32	0.02229	0.01562	NS
A*33	0.00637	0.01562	NS
A*34	0.00955	0	NS
A*66	0.01592	0	NS
A*68	0.07006	0.03906	NS
A*69	0	0	-
A*74	0	0	-
A*80	0.00637	0	NS
B*07	0.05732	0.07812	NS
B*08	0.07006	0.03125	NS
B*13	0.00955	0.00781	NS
B*14	0.03185	0.11719	0.001	0.024
B*15	0.06688	0.02344	NS
B*18	0.10828	0.10156	NS
B*27	0.02229	0.03125	NS
B*35	0.11465	0.08594	NS
B*37	0.01274	0.01562	NS
B*38	0.03503	0.02344	NS
B*39	0.02548	0.02344	NS
B*40	0.03503	0.03125	NS
B*41	0.02229	0.03125	NS
B*42	0	0	-
B*44	0.14331	0.14062	NS
B*45	0.00318	0.03906	NS
B*47	0	0	-
B*49	0.03185	0.02344	NS
B*50	0.02229	0.03125	NS
B*51	0.11783	0.0625	0.0855	2.052
B*52	0.00318	0.03125	NS
B*53	0.02548	0	NS
B*55	0.00318	0.02344	NS
B*56	0.00637	0	NS
B*57	0.01911	0.03125	NS
B*58	0.01274	0.01562	NS
B*59	0	0	-
B*67	0	0	-
B*73	0	0	-
B*78	0	0	-
C*01	0.02548	0.02344	NS
C*02	0.05096	0.03125	NS
C*03	0.06051	0.0625	NS
C*04	0.15924	0.07812	0.0311	0.4354
C*05	0.10828	0.11719	NS
C*06	0.07643	0.09375	NS
C*07	0.23248	0.19531	NS
C*08	0.03822	0.125	0.001	0.014
C*12	0.06688	0.08594	NS
C*14	0.03503	0.01562	NS
C*15	0.05096	0.03125	NS
C*16	0.07325	0.10938	NS
C*17	0.02229	0.02344	NS
C*18	0	0.00781	NS
DRB1*01	0.07325	0.08594	NS
DRB1*03	0.16242	0.15625	NS
DRB1*04	0.14331	0.11719	NS
DRB1*07	0.17516	0.22656	NS
DRB1*08	0.02548	0	NS
DRB1*09	0.00955	0.00781	NS
DRB1*10	0.00955	0.03125	NS
DRB1*11	0.12739	0.10938	NS
DRB1*12	0.00637	0	NS
DRB1*13	0.15605	0.10156	NS
DRB1*14	0.02229	0.03125	NS
DRB1*15	0.05414	0.09375	NS
DRB1*16	0.03503	0.03906	NS
DQB1*02	0.31847	0.36719	NS
DQB1*03	0.34713	0.24219	0.0327	0.1635
DQB1*04	0.02548	0.00781	NS
DQB1*05	0.16242	0.20312	NS
DQB1*06	0.1465	0.17969	NS
